# Supplementary material for: Immunogenicity, Safety, and Tolerability of 13-Valent Pneumococcal Conjugate Vaccine Followed by 23-Valent Pneumococcal Polysaccharide Vaccine in Recipients of Allogeneic Hematopoietic Stem Cell Transplant Aged ≥2 Years: An Open-Label Study
Source: PubMed Central journal article supplement — Clin Infect Dis. 2015 Apr 13;61(3):313–23. doi: 10.1093/cid/civ287 (PMC4503811; doi:10.1093/cid/civ287), 2015-04-13
Supplement: supp_civ287_civ287supp_fig2.pdf [file supp_civ287_civ287supp_fig2.pdf]

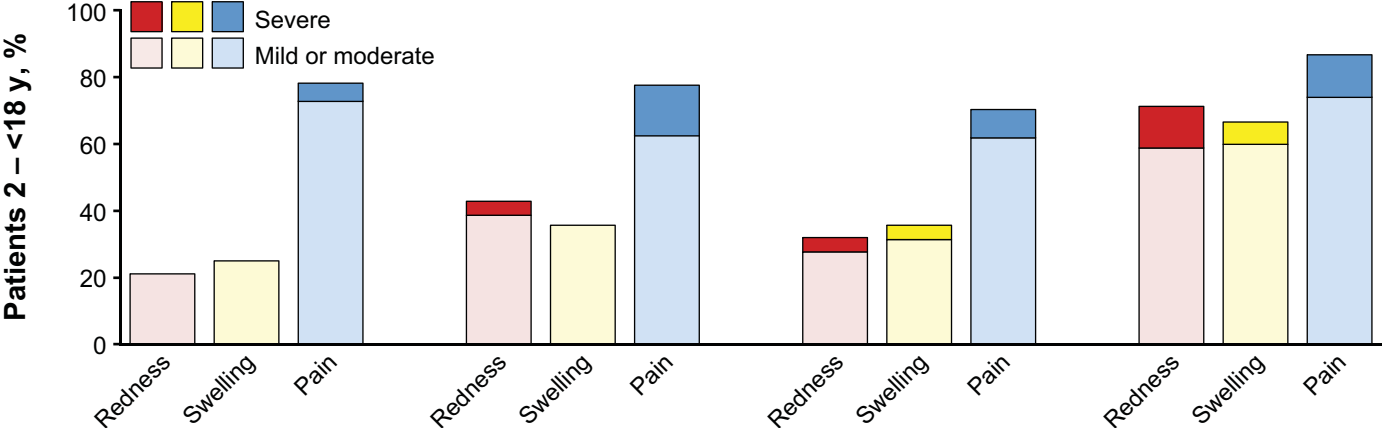

Redness and swelling: mild, 0.5 to 2.0 cm; moderate, 2.5 to 7.0 cm; severe, >7.0 cm.

Pain: mild, does not interfere with activity; moderate, some interference with activity; severe, prevents daily activity.

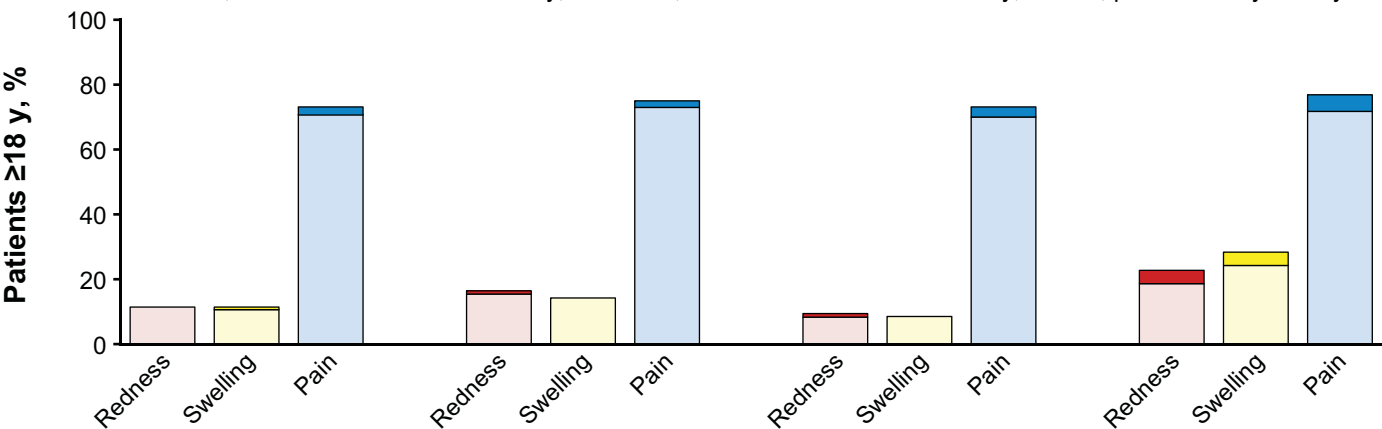

Redness and swelling: mild, 2.5 to 5.0 cm; moderate, 5.1 to 10.0 cm; severe, >10.0 cm.

Pain: mild, does not interfere with activity; moderate, some interference with activity; severe, prevents daily activity.

**Dose 1**

**Dose 2**

**Dose 3**

**Dose 4**

**Supplementary Figure 2.** Percentage of patients reporting local reactions within 14 days of PCV13.
