# Supplementary figures and images for: Immunogenicity, Safety, and Tolerability of 13-Valent Pneumococcal Conjugate Vaccine Followed by 23-Valent Pneumococcal Polysaccharide Vaccine in Recipients of Allogeneic Hematopoietic Stem Cell Transplant Aged ≥2 Years: An Open-Label Study
Source: PubMed Central journal article supplement — Clin Infect Dis. 2015 Apr 13;61(3):313–23. doi: 10.1093/cid/civ287 (PMC4503811; doi:10.1093/cid/civ287), 2015-04-13

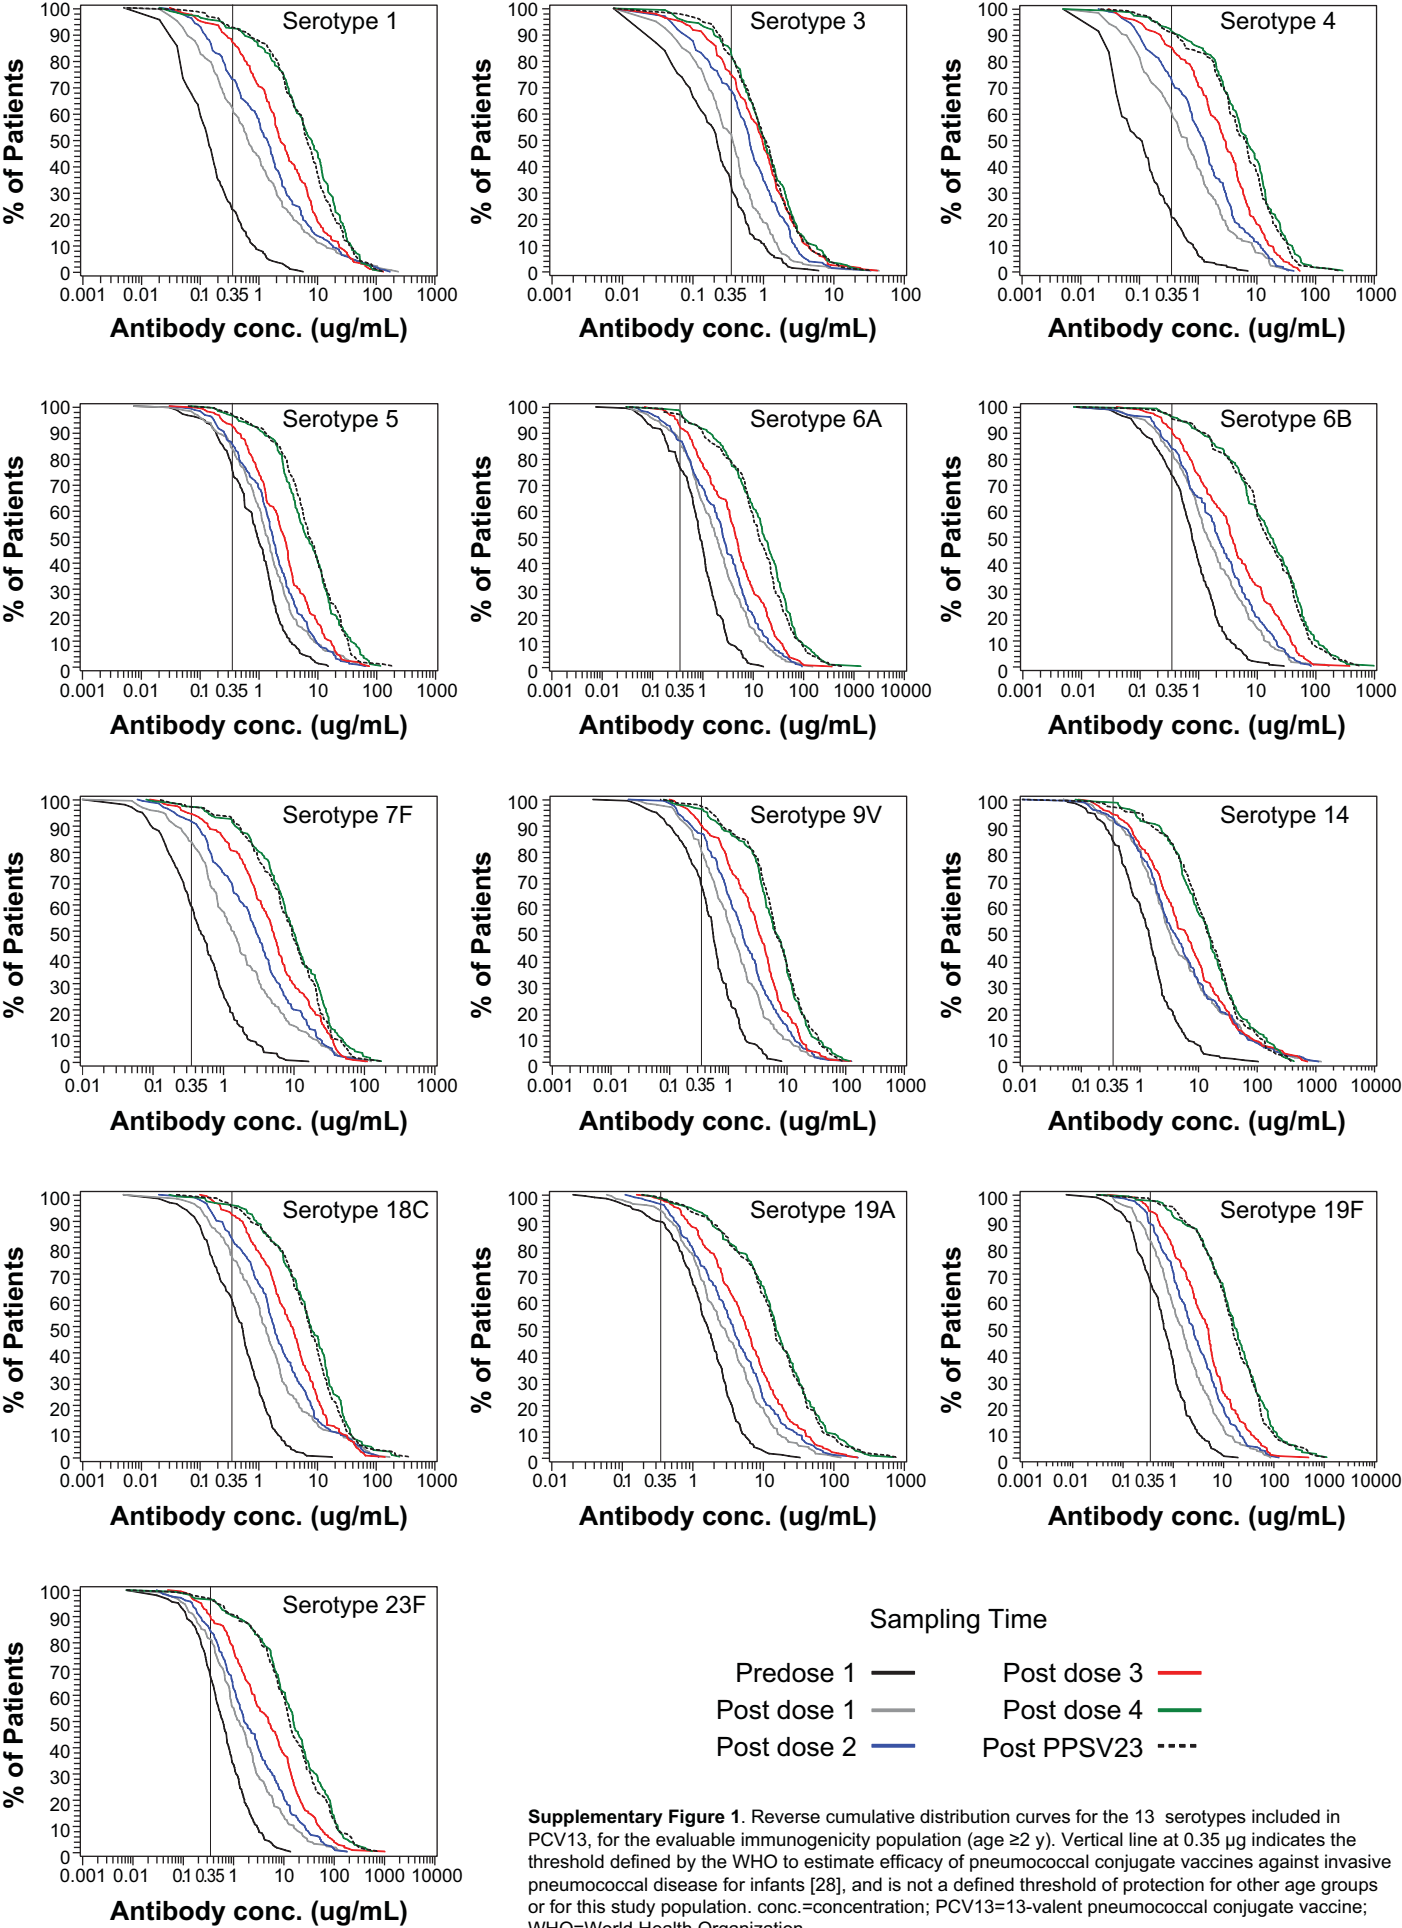

Supplement: supp_civ287_civ287supp_fig1.pdf [file supp_civ287_civ287supp_fig1.pdf]
